# Supplementary material for: Combined Effects of Polyamide Microplastics and Hydrochemical Factors on the Transport of Bisphenol A in Groundwater
Source: MDPI journal article supplement (doi:10.3390/separations10020123), 2023-02-09
Supplement: s1 [file s1]

## Supplementary Material

# Combined Effects of Polyamide Microplastics and Hydrochemical Factors on the Transport of Bisphenol A in Groundwater

Zhou Cheng <sup>1,2,†</sup>, Xuanhao Lin <sup>1,†</sup>, Ming Wu <sup>1,3,4,\*</sup>, Guoping Lu <sup>1,\*</sup>, Yanru Hao <sup>1</sup>, Cehui Mo <sup>1</sup>, Qusheng Li <sup>5</sup>, Jianfeng Wu <sup>3</sup>, Jichun Wu <sup>3</sup> and Bill X. Hu <sup>6</sup>

<sup>1</sup> Guangdong Provincial Research Center for Environment Pollution Control and Remediation Materials, College of Life Science and Technology, Jinan University, Guangzhou 510632, China

<sup>2</sup> Guangdong Provincial Academy of Environmental Science, Guangzhou 510045, China

<sup>3</sup> Key Laboratory of Surficial Geochemistry, Department of Hydrosociology, School of Earth Sciences and Engineering, Ministry of Education, Nanjing University, Nanjing 210023, China

<sup>4</sup> Guangdong Yixin Ecological Technology Co., Ltd., Guangzhou 510055, China

<sup>5</sup> Guangdong Key Laboratory of Environmental Pollution and Health, School of Environment, Jinan University, Guangzhou 510632, China

<sup>6</sup> School of Water Conservancy and Environment, University of Jinan, Jinan 250022, China

\* Correspondence: wumingnj@foxmail.com (M.W.); gpl21jnu@126.com (G.L.)

† These authors contributed equally to this work.

**Table S1.** The parameters of isotherm models for BPA adsorption on PA and QS

| Media | Langmuir model                     |                                    |       | Freundlich model                   |       |       |
|-------|------------------------------------|------------------------------------|-------|------------------------------------|-------|-------|
|       | $p_m(\text{mg}\cdot\text{g}^{-1})$ | $K_L(\text{L}\cdot\text{mg}^{-1})$ | $R^2$ | $K_F(\text{mg}\cdot\text{g}^{-1})$ | $n$   | $R^2$ |
| PA    | 35.9                               | 0.001                              | 0.999 | 0.04                               | -0.93 | 0.999 |
| QS    | 0.002                              | 3.4                                | 0.925 | 1.59                               | -1.38 | 0.959 |

**Table S2.** Kinetic adsorption parameters for the adsorption of BPA on PA

| Media | Quasi-first-order kinetic adsorption model |                        |       | Quasi-second-order kinetic adsorption model |                                                   |       |
|-------|--------------------------------------------|------------------------|-------|---------------------------------------------|---------------------------------------------------|-------|
|       | $p_{m1}(\text{mg}\cdot\text{g}^{-1})$      | $k_1(\text{min}^{-1})$ | $R^2$ | $p_{m2}(\text{mg}\cdot\text{g}^{-1})$       | $k_2(\text{g}\cdot\text{min}\cdot\text{mg}^{-1})$ | $R^2$ |
| PA    | 12.16                                      | 0.02                   | 0.826 | 8.72                                        | -1.59                                             | 0.299 |

(a) BPA

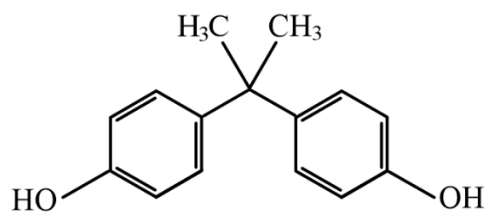

(b) PA66

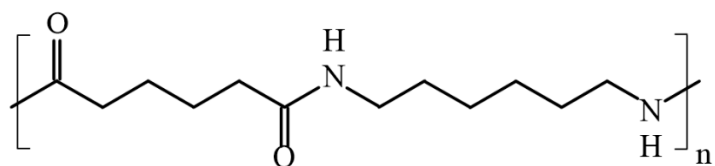

**Figure S1.** Molecular structure formula of BPA and PA66

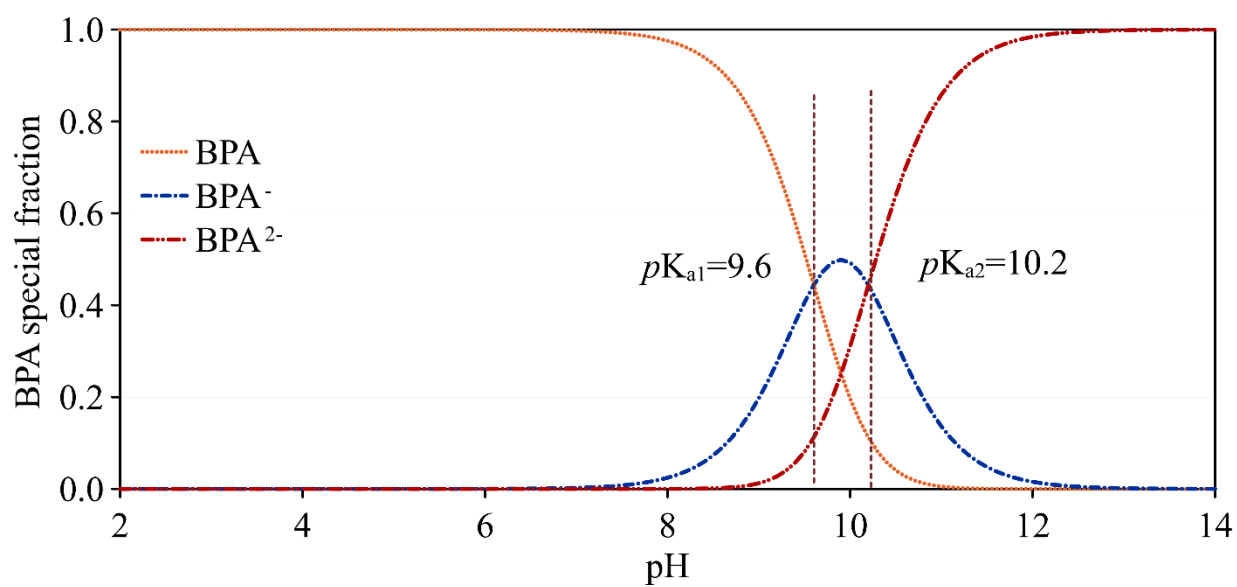

**Figure S2.** The existence form of BPA under different pH conditions

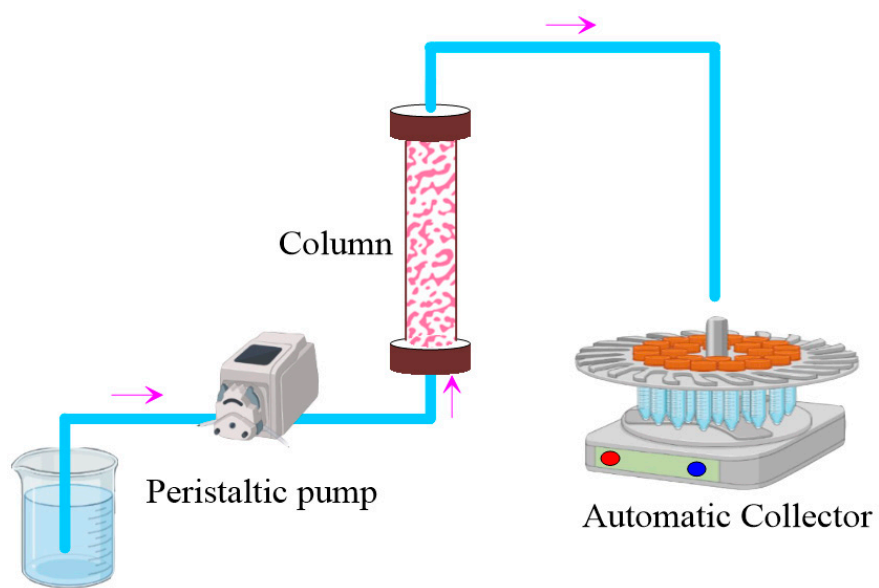

**Figure S3.** The device diagram of column experiment

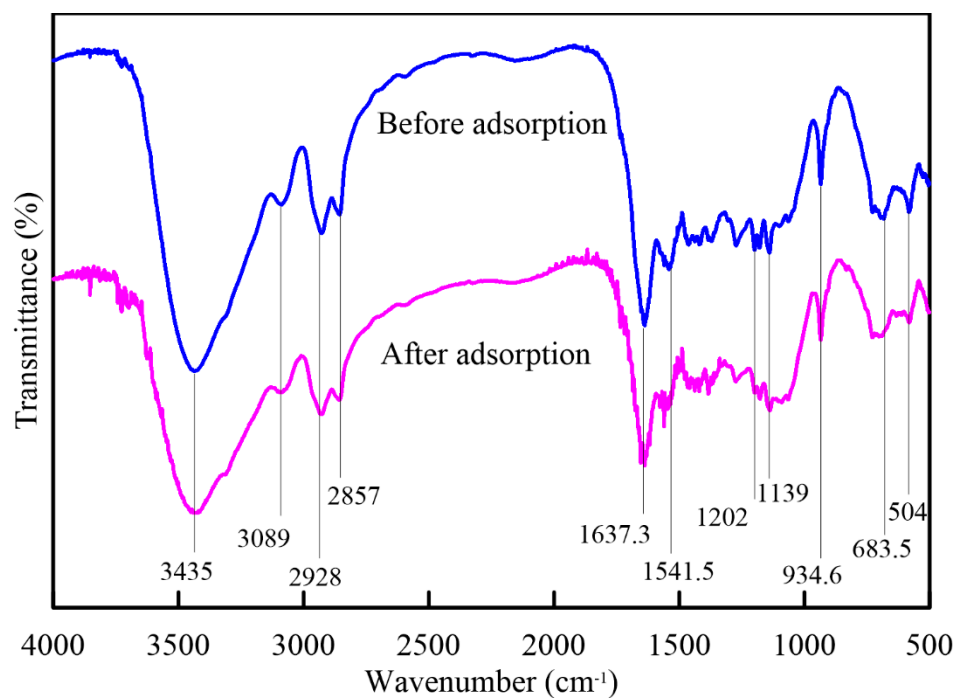

**Figure S4.** FTIR spectra of PA before and after adsorption experiments

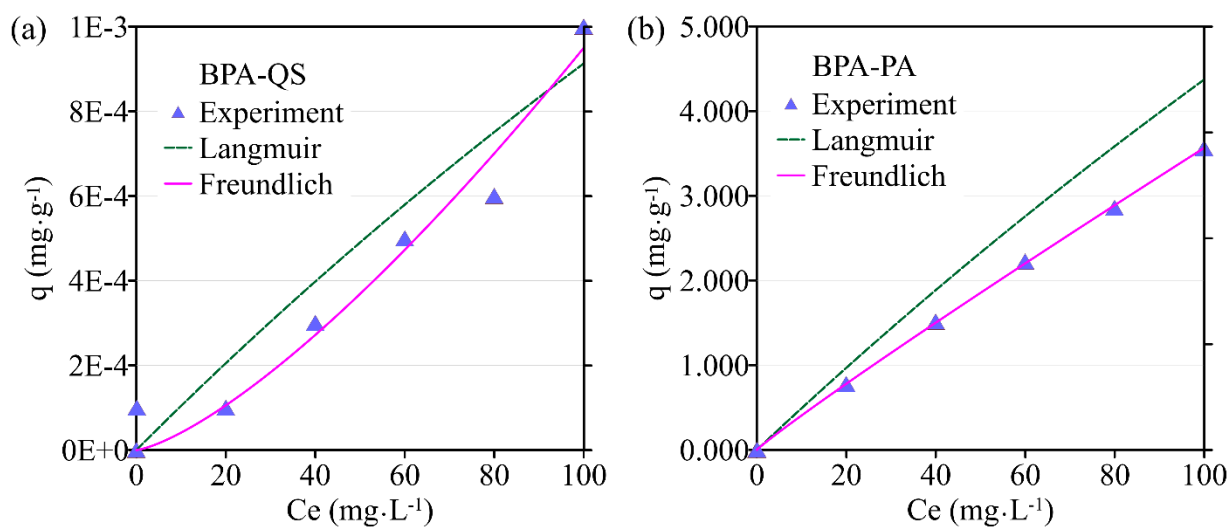

**Figure S5.** The results of adsorption experiments: (a) Isothermal adsorption model of BPA on PA and QS; (b) Quasi-first-order kinetic adsorption model and quasi-second-order kinetic adsorption model of BPA on PA
