# Supplementary material for: Combined Effects of Polyamide Microplastics and Hydrochemical Factors on the Transport of Bisphenol A in Groundwater
Source: MDPI journal article supplement (doi:10.3390/separations10020123), 2023-02-09
Supplement: s1 [file s1]

Archive with 1 entries (1 files):
- separations-2085906-supplementary.pdf
